# Supplementary material for: Development of Efficient Sodium Alginate/Polysuccinimide-Based Hydrogels as Biodegradable Acetaminophen Delivery Systems
Source: MDPI journal article supplement (doi:10.3390/gels9120980), 2023-12-14
Supplement: s1 [file s1]

## Supplementary Materials

# Development of Efficient Sodium Alginate/Polysuccinimide-Based Hydrogels as Biodegradable Acetaminophen Delivery Systems

Long Toan Trinh <sup>1</sup>, Saebin Lim <sup>1</sup>, Hyun Jong Lee <sup>1,\*</sup> and Il Tae Kim <sup>1,\*</sup>

<sup>1</sup> Department of Chemical and Biological Engineering, Gachon University, Seongnam-si 13120, Gyeonggi-do, Republic of Korea

\* Correspondence: [itkim@gachon.ac.kr](mailto:itkim@gachon.ac.kr) (I.T. Kim), [hjlee2@gachon.ac.kr](mailto:hjlee2@gachon.ac.kr) (H.J. Lee)

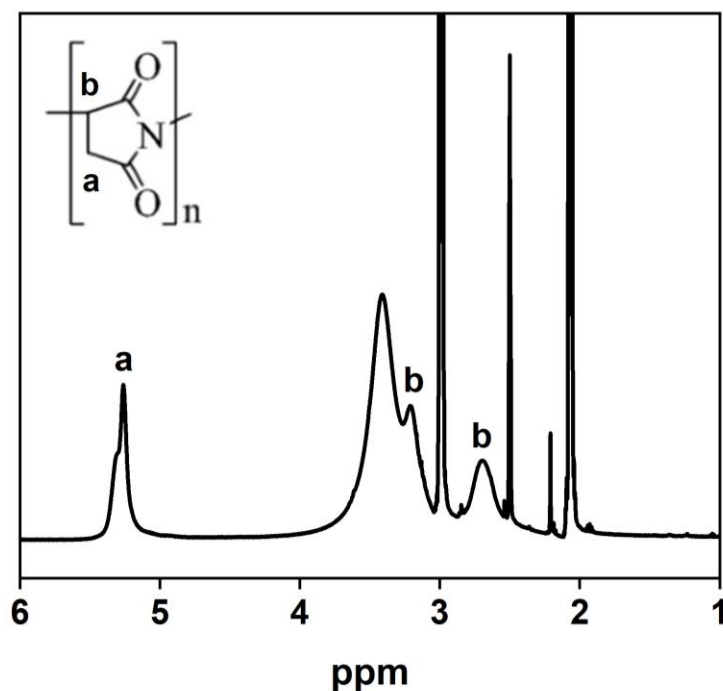

Figure S1. <sup>1</sup>H NMR of polysuccinimide.

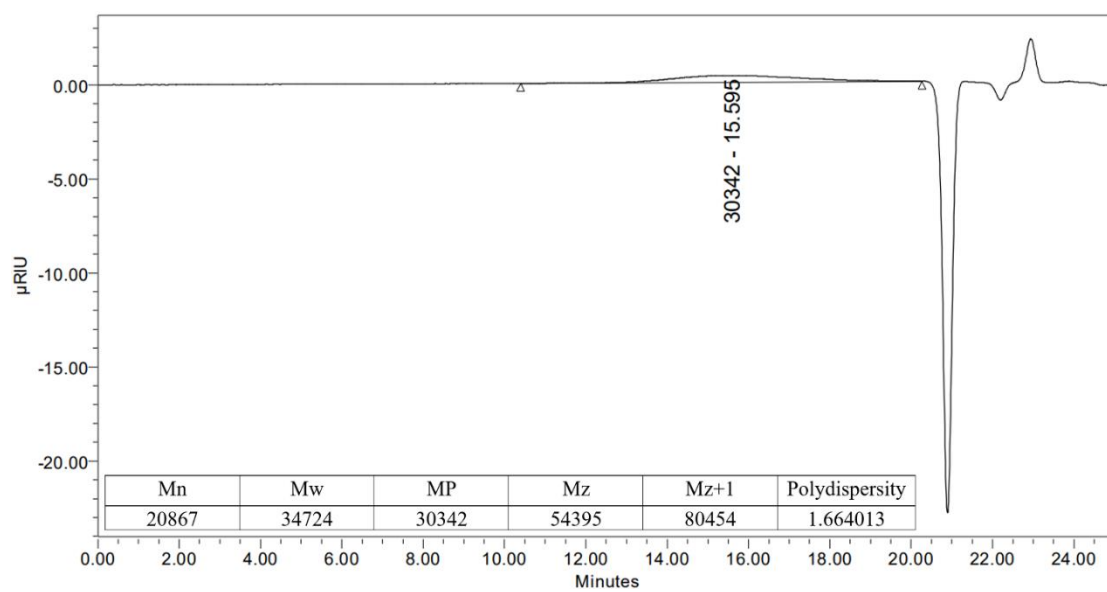

**Figure S2.** GPC of polysuccinimide.
